# Supplementary material for: A study on the synthesis, pair distribution function and diverse properties of cobalt doped ZnS nanowires
Source: Royal Society of Chemistry journal article supplement (doi:10.1039/c5ce02253c), 2016-01-01
Supplement: c5ce02253c1.pdf [file c5ce02253c1.pdf]

## Synthesis, pair distribution function and diverse properties study on cobalt doped ZnS nanowires<sup>†</sup>

Received 00th January 20xx,  
Accepted 00th January 20xx

U. P. Gawai,<sup>a</sup> H. A. Khawal,<sup>a</sup> T. Shripathi<sup>b</sup> and B. N. Dole<sup>\*a</sup>

DOI: 10.1039/x0xx00000x

www.rsc.org/

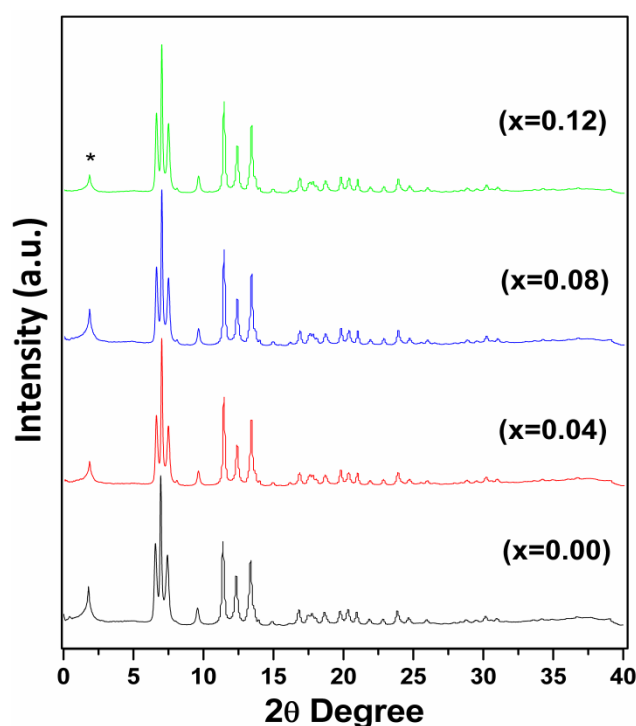

**Supplemental Fig. 1** Full scan synchrotron X-ray Diffraction patterns of pure and Co doped ZnS NWs.

Supplemental fig. 1 shows the full range of angle which was taken from synchrotron X-ray diffraction patterns. Also in fig. 1 star

<sup>a</sup> Advanced Materials Research Laboratory, Department of Physics, Dr. Babasaheb Ambedkar Marathwada University Aurangabad-431 004, India.

Email: drbndole.phy@gmail.com

<sup>b</sup> ESCA lab, UGC DAE CSR Indore, India.

<sup>†</sup> Electronic Supplementary Information (ESI) available: Supplemental Fig. 1 shows SXRD patterns, fig. 2, 3 shows TEM image of pure ZnS and 4% Co doped ZnS nanowires with different magnification and fig. 4 shows EDS spectra of samples. Table 1 gives the values of elemental concentration. See DOI: 10.1039/x0xx00000x

indicated the background observed while performing experiment at beamline.

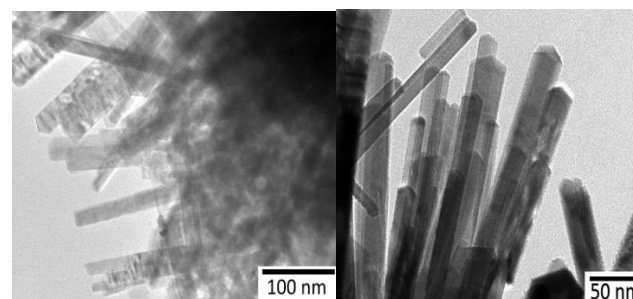

**Supplemental Fig. 2** TEM image of pure ZnS nanowires with different magnification.

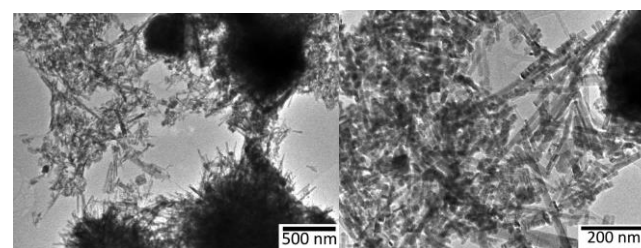

**Supplemental Fig. 3** TEM image of 4% Co doped ZnS nanowires with different magnification.

The pure and 4% co doped ZnS nanowires shown in fig. 2 and 3 with different magnification respectively. The growth of nanowires clearly observed in TEM image.

**Table 1** Weight and atomic percentage of pure and Co doped ZnS Nanowires.

| Samples (x) | Weight % |      |       | Atomic % |      |       |
|-------------|----------|------|-------|----------|------|-------|
|             | Zn       | Co   | S     | Zn       | Co   | S     |
| 0.00        | 69.18    | 0.00 | 30.82 | 52.40    | 0.00 | 47.60 |
| 0.04        | 67.90    | 1.97 | 30.13 | 51.63    | 1.66 | 46.71 |
| 0.08        | 66.95    | 2.90 | 30.16 | 50.85    | 2.44 | 46.70 |
| 0.12        | 63.91    | 3.68 | 32.41 | 47.67    | 3.05 | 49.29 |

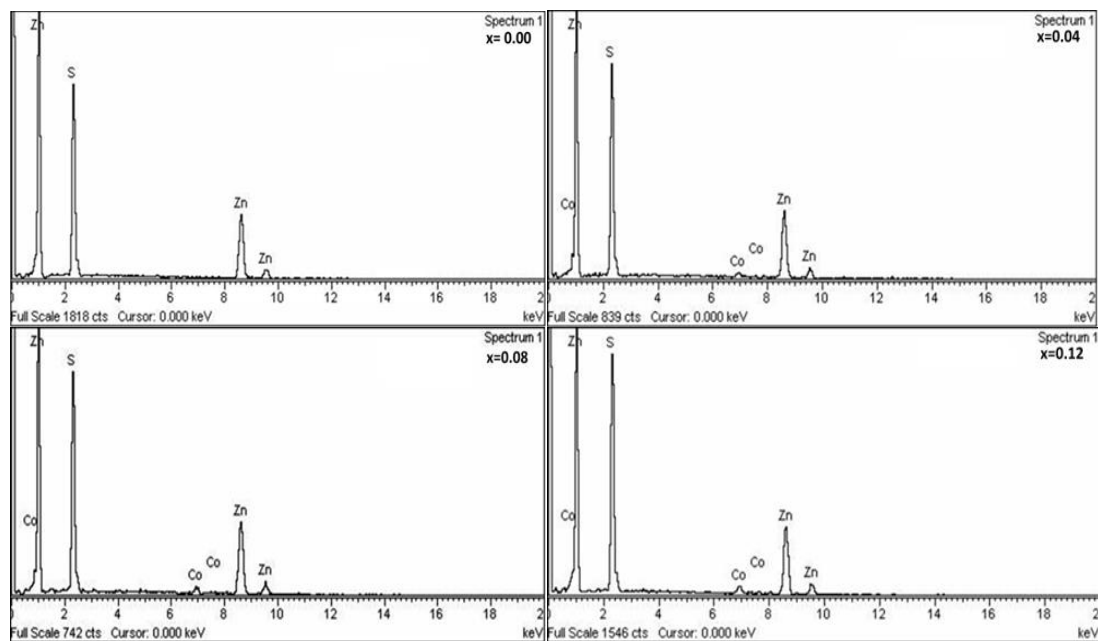**Supplemental Fig. 4** EDS spectra of pure and Co doped ZnS nanowires.
